1 **Refining the genomic location of SNP variation affecting Atlantic salmon maturation timing**  
2 **at a key large-effect locus**

3 Marion Sinclair-Waters<sup>1,2\*</sup>, Nikolai Piavchenko<sup>1,2</sup>, Annukka Ruokolainen<sup>1,2</sup>, Tutku Aykanat<sup>1,2</sup>,  
4 Jaakko Erkinaro<sup>3</sup> & Craig R. Primmer<sup>1,2</sup>

5

6 <sup>1</sup>Organismal and Evolutionary Biology Research Programme, Faculty of Biological and  
7 Environmental Sciences University of Helsinki, Helsinki, Finland

8 <sup>2</sup>Institute of Biotechnology, Helsinki Institute of Life Sciences, University of Helsinki, Helsinki,  
9 Finland

10 <sup>3</sup>Natural Resources Institute Finland (LUKE), Oulu, Finland

11 \*Corresponding author: [msinclairwaters@gmail.com](mailto:msinclairwaters@gmail.com)

12

13 ABSTRACT

14 Efforts to understand the genetic underpinnings of phenotypic variation are becoming more and  
15 more frequent in molecular ecology. Such efforts often lead to the identification of candidate  
16 regions showing signals of association and/or selection. These regions may contain multiple genes  
17 and therefore validation of which genes are actually responsible for the signal is required. In  
18 Atlantic salmon (*Salmo salar*), a large-effect locus for maturation timing, an ecologically important  
19 trait, occurs in a genomic region including two genes, *vgl3* and *akap11*, but data for clearly  
20 determining which of the genes (or both) contribute to the association have been lacking. Here, we  
21 take advantage of natural recombination events detected between the two candidate genes in a  
22 salmon broodstock to reduce linkage disequilibrium at the locus, and thus enabling delineation of  
23 the influence of variation at these two genes on maturation timing. By rearing 5895 males to  
24 maturation age, of which 81% had recombinant *vgl3/akap11* allelic combinations, we found that  
25 *vgl3* SNP variation was strongly associated with maturation timing, whereas there was little or no  
26 association between *akap11* SNP variation and maturation timing. These findings provide strong  
27 evidence supporting *vgl3* as the primary candidate gene in the chromosome 25 locus for  
28 influencing maturation timing. This will help guide future research for understanding the genetic  
29 processes controlling maturation timing. This also exemplifies the utility of natural recombinants to  
30 more precisely map causal variation underlying ecologically important phenotypic diversity.

31

32

### 33 INTRODUCTION

34       The identification of genetic variation underlying phenotypic variation is a common goal in  
35 biology. A first step towards this goal is commonly a ‘genome scan’, where variation across the  
36 entire genome, or significant proportion of it, is scanned for signatures of selection and/or genotype-  
37 phenotype associations. When phenotype measurements are unavailable, or if there is no prior  
38 knowledge of adaptive phenotypes, genome scans identify loci potentially under selection via  
39 outlier testing (Pritchard et al. 2018; Kardos et al. 2015; Sinclair-Waters et al. 2017). Whereas when  
40 phenotypic measurements are available, genome scans can be used to search for associations  
41 between genetic and phenotypic variation (Barson et al. 2015; Johnston et al. 2014; 2011). When  
42 successful, signals of association and/or selection often lead to the identification of genomic regions  
43 including multiple candidate genes. In cases where a signal is particularly strong, a logical follow-  
44 up aim is to better validate which genes are actually linked to the signal. Such validation of  
45 candidate genes in model systems can be done via knock-outs (e.g. The International Mouse  
46 Knockout Consortium 2007; Varshney et al. 2013), and CRISPR (Sander and Joung 2014).  
47 Recently, candidate gene validation using CRISPR has been achieved in some free-living taxa such  
48 as butterflies (Livraghi et al. 2018; Concha et al. 2019; Woronik et al. 2019), sticklebacks  
49 (*Gasterosteus aculeatus*) (Wucherpfennig, Miller, and Kingsley 2019) and some crops (Rodríguez-  
50 Leal et al. 2017; Sedeek, Mahas, and Mahfouz 2019), but this is not yet feasible in many free-living  
51 species and likely will not enable testing of candidate variation in the wild. However traditional  
52 mapping approaches, where natural recombination events can be exploited to delineate the effects  
53 of linked genes, can be used when such natural recombinants are identified and where controlled  
54 crossing, followed by phenotypic assessment is feasible. Here, we use Atlantic salmon (*Salmo*  
55 *salar*) as a model system for how this approach can be applied to delineate the effects of linked  
56 genes at a locus associated with a trait of ecological relevance.

57       Atlantic salmon are an anadromous species that can spend one to seven years in freshwater,  
58 before migrating to the ocean where they can spend another one to five years before reaching  
59 maturation and returning to their natal rivers to spawn. Furthermore some (mostly) male  
60 individuals, known as mature parr, reach maturation in the freshwater environment without having  
61 migrated to sea. This age at maturity can vary both within and among populations, and contributes  
62 markedly to the diversity of life-history strategies of this species (Mobley et al. 2021; Erkinaro et al.  
63 2019). Late maturation is associated with larger size, and therefore increased fecundity in females  
64 and greater reproductive success in males. Maturing at a later age, however, also increases the risk  
65 of mortality prior to reproduction (Mobley et al. 2020; Fleming and Einum 2011). Many loci with a

66 variety of effect sizes are associated with Atlantic salmon maturation timing (Sinclair-Waters et al.  
67 2020). One locus on chromosome 25, of particular interest due to its large effect size, explains close  
68 to 40% of the variation in age at maturity in both wild populations and aquaculture strains from  
69 Northern Europe (Barson et al. 2015; Ayllon et al. 2015). The SNP with the strongest association at  
70 this locus was located 7.9kb downstream of the *vgll3* gene and 45.4kb upstream of the *akap11* gene  
71 (Barson et al. 2015). In another association study using individual-level sequencing data capturing  
72 more sequence variation, Sinclair-Waters et al. (2021) also found that the SNP with the strongest  
73 association was located in the region between these two genes, however, slightly further  
74 downstream of *vgll3* (10.3kb) and closer to *akap11*. Additionally, two missense mutations occur  
75 within *vgll3* and one missense mutation occurs within *akap11*. Although not the most strongly  
76 associated SNPs with age at maturity, all three missense mutations showed a significant association  
77 signal in wild populations (Barson et al. 2015; Ayllon et al. 2015).

78 In addition to the strong association signals observed on chromosome 25, both *vgll3* and  
79 *akap11* are plausible candidates for influencing maturation timing given their reported functions.  
80 The *vgll3* gene, vestigial-like family member 3, is a transcription cofactor that inhibits adipogenesis  
81 and is associated with mouse weight and total fat mass (Halperin et al. 2013). In many species,  
82 including salmon, sufficient fat storage is needed to provide energy for maturation (Good and  
83 Davidson 2016), thus suggesting *vgll3* is a good candidate gene for Atlantic salmon maturation.  
84 Additionally, *VGLL3* is associated with age at maturity in humans (Cousminer et al. 2013; Day et  
85 al. 2017; Perry et al. 2014). The *akap11* gene encodes A-kinase anchoring protein 11. Evidence  
86 showing that A-kinase-anchoring proteins are expressed in testes during spermatogenesis and are  
87 important for sperm motility in humans (Reinton et al. 2000; Luconi et al. 2004) and mice (Miki et  
88 al. 2002) suggests that *akap11* may be important for sperm function and thus also a good candidate  
89 gene for involvement in Atlantic salmon maturation. Further, the expression patterns of *vgll3* and  
90 *akap11* have been shown to be correlated in various Atlantic salmon juvenile life history stages  
91 (Kurko et al. 2020). Both genes are plausible candidates for maturation and therefore determining  
92 whether the locus' association with maturation timing is linked to *vgll3*, *akap11* or both genes is an  
93 important step for understanding the genetic process underlying variation in maturation timing in  
94 Atlantic salmon.

95 Here, we capitalize on the occurrence of a recombination event between the *vgll3* and *akap11*  
96 genes in a large number of individuals from a captive Atlantic salmon broodstock to delineate the  
97 effects of these two adjacent and physically linked genes, on maturation timing. Progeny from 16  
98 independent families were bred using controlled crosses where at least one parent carried the

99 recombinant alleles, and 5895 males were reared to maturation age. This allowed testing of whether  
100 the association of this chromosomal region with maturation is driven by SNP variation linked to  
101 *vgll3* or *akap11*, or a combination of both. The results provide greater resolution of the association  
102 signal at a known large-effect locus and help to narrow down the possible genomic location of  
103 causal variation underlying maturation timing in Atlantic salmon.

104

## 105 METHODS

### 106 *Animal material*

107 We reared 16 families using parental Atlantic salmon (*Salmo salar*) from a Neva river strain  
108 maintained at a Natural Resources Institute Finland hatchery in Laukaa, Finland (62°24'N,  
109 25°57'E) (See Debes et al. 2019 for more broodstock details). Parents were chosen from a total of  
110 702 broodstock individuals that had earlier been genotyped for 177 SNPs on Ion Torrent or Illumina  
111 (Miseq or Next-Seq) sequencing platforms as outlined in Aykanat et al. (2016). These SNPs  
112 included two missense SNPs in *vgll3*, the top-associated SNP from Barson et al. (Barson et al.  
113 2015) located 7.9kb downstream of *vgll3*, and one missense SNP in *akap11*. We selected parents  
114 based on their *vgll3* and *akap11* genotypes that would maximize the proportion of offspring with a  
115 recombination event between the *vgll3* and *akap11* genes. For example, individuals carrying a  
116 haplotype with an *L* allele for *vgll3* and an *E* allele for *akap11*, or vice versa. We avoided crossing  
117 closely related individuals (those with grandparents in common) by using SNP-based pedigree  
118 reconstruction as in Debes et al. (2019). Additionally, we selected only parents that had the same  
119 genotype at the two *vgll3* missense mutations and top-associated non-coding SNP identified in  
120 Barson et al. (2015). From this point onwards, four character genotypes will be used to describe an  
121 individual's genotype at the focal loci, *vgll3* and *akap11*. The first two characters indicate the  
122 genotype at the *vgll3* locus and the last two characters indicate the genotype at the *akap11* locus.  
123 The locus is indicated in subscript text after the genotype. Details of the 16 crosses are outlined in  
124 Table 1 (Supplementary Table 1).

### 125 *Fish husbandry*

126 Eggs were fertilized in November 2019 and incubated in mesh-separated compartments (to  
127 keep families separate) in vertical incubators with re-circulated water at a mean water temperature  
128 of 7.1°C. Compartments were randomly organized in the incubator. At the eyed-egg stage, each  
129 family was transferred to one of sixteen 285L tanks equipped with two water recirculation systems  
130 that have controlled water temperature, oxygen, and light conditions. Water parameters such as pH,

131 ammonia, nitrite and nitrate were also monitored. Tank water temperature ranged from 5.2°C to  
132 17.6°C (Supplementary Figure 1). Tank lighting followed the natural cycle that would occur at  
133 62°24'N and 25°57'E. Fish were fed live *Artemia* for ten days and then fed commercial aquaculture  
134 feed ad libitum (Raisio Baltic Blend) for the remainder of the experiment. Size of feed pellets  
135 increased over time according to fish size. In 12 of the 16 tanks (those with the largest family sizes)  
136 12mm passive integrated transponder tags were inserted into the body cavity, and a fin clip taken,  
137 during June-July 2019 following anaesthesia with methanesulfonate to enable re-identification and  
138 genotyping. Water temperature was decreased to 13°C for this period to reduce stress of fish due to  
139 handling. In order to keep the biomass of these 12 tanks at an acceptable level towards the end of  
140 the experiment, females were identified based on genotypic sex and culled July to September 2020.  
141 This strategy was chosen as only male Atlantic salmon are able to mature at one year of age in  
142 captivity (Debes et al. 2019) and therefore maximizing male numbers also maximizes sample sizes  
143 for the maturation phenotype. Nevertheless, a minimum of 40 females were retained in each tank. In  
144 some cases biomass levels became too high even following culling of females and therefore some  
145 males were randomly culled between September and November 2020.

#### 146 *DNA Extraction & Genotyping*

147 Fin clips from all individuals were placed directly into *Lucigen QuickExtract DNA Extraction*  
148 *Solution 1.0* to extract DNA. The *vgl3*, *akap11* and *SDY* loci were genotyped using the  
149 Kompetitive allele-specific polymerase chain reaction (KASP<sup>TM</sup>) method (He, Holme, and Anthony  
150 2014). Two alternative allele specific forward primers and one reverse primer were designed by  
151 *LGC Biosearch Technologies* for the *vgl3* and *akap11* loci. An amplification/non-amplification  
152 assay was designed for the male specific *SDY* locus, and this assay also included primers for  
153 amplification of a region of the 18S locus as a positive control for assay performance  
154 (Supplementary Table 2). The reaction mix for each reaction consisted of 2.5 µl of sample DNA,  
155 2.5 µl KASP 2x Master mix, 0.07 µl KASP Assay mix which contains the locus-specific primers.  
156 The reactions were performed with qPCR machines (C1000 Thermal cycler with CFX384 Real-  
157 Time System, Bio-Rad) and the following thermal cycling conditions: 94°C for 15 minutes (1  
158 cycle); 94°C for 20 seconds, 61°C for 1 minutes and decreasing temperature by 0.6°C per cycle (10  
159 cycles); 94°C for 20 seconds, 55°C for 1 minute (29 cycles); 37°C for 1 minute; 94°C for 20  
160 seconds, 57°C for 1 minute (3 cycles); 37°C for 1 minute, read plate; and 4°C for 3 minutes.  
161 Genotypes of the *vgl3* and *akap11* SNPs were called using allelic discrimination implemented in  
162 the CFX Maestro software (*Bio-Rad*). Genotypic sex was determined by analyzing the per-  
163 individual difference between ROX-standardized FAM and HEX fluorescence values using the

164 *normalmixEM* function in *mixtools R* package. Florescence of the FAM alleles indicates the  
165 presence of the SDY locus (Supplementary Table 2), which is male-specific in Atlantic salmon  
166 (Yano et al. 2012). An individual with a FAM-HEX value within two standard deviations from the  
167 mean of the upper normal distribution was considered a male. In contrast, individuals with a FAM-  
168 HEX value within two standard deviations of the lower normal distribution mean were considered  
169 female.

#### 170 *Data collection*

171 At the completion of the experiment during November and December, 2020, we recorded  
172 length (fork length), mass and maturity status (immature/mature) for all male individuals. To  
173 identify males, individuals were dissected and checked internally for the presence of male or female  
174 gonads. Maturity status was determined via examination of the gonads size and colour. Individuals  
175 were considered mature if the gonads were a milky white colour and enlarged so that they filled at  
176 least 75% of the body cavity. For a subset of individuals (N=632) that were kept alive for a different  
177 experiment and could not be dissected, we relied on genotypic sex. Maturity status for these males  
178 was determined by pressing on the abdomen and checking for the release of milt, which would  
179 indicate the male was mature.

#### 180 *Data analysis*

181 We tested for an association between maturation status in male Atlantic salmon and the  
182 genotypes of two adjacent genes, *vgl3* and *akap11*. Maturation status was modelled as a binary trait  
183 (immature=0, mature=1) using mixed-effect logistic regression implemented in *lme4 R* package.  
184 We first identified the most parsimonious null model, with no genetic terms, to fit the data. Fork  
185 length, Fulton's condition factor and their interaction were included as fixed effects and family was  
186 included as a random effect. Fork length and Fulton's condition factor were mean-centred. Using  
187 the *dredge* function in the *MuMin* package in *R* (Barton 2020), the most parsimonious model was  
188 selected based on each models corrected Akaike Information Criterion (AICc) scores. Genetic terms  
189 for the focal loci, *vgl3* and *akap11*, are then added to the selected model to test for an effect of  
190 these loci on maturation odds. We first modelled the effect of both genes on maturation status by  
191 including each locus as its own genetic term. The genetic terms were included as a categorical  
192 effect, rather than numerical, in order to not assume an additive genetic effect. We then examined  
193 the effect of combined genotypes on maturation odds by including genotypes at each gene as a  
194 single term in the model. We compared combined genotypes where alleles at one gene were the  
195 same and alleles at the other gene varied. Two models included genotypes where *akap11* genotype

196 remained consistent but *vgll3* genotype varied: 1)  $EE_{vgll3}EE_{akap11}$ ,  $EL_{vgll3}EE_{akap11}$ ,  $LL_{vgll3}EE_{akap11}$  and  
197 2)  $EL_{vgll3}EL_{akap11}$ ,  $LL_{vgll3}EL_{akap11}$ . The other two models included genotypes where *vgll3* genotype  
198 remained consistent but *akap11* genotype varied: 3)  $EL_{vgll3}EE_{akap11}$ ,  $EL_{vgll3}EL_{akap11}$  and 4)  
199  $LL_{vgll3}EE_{akap11}$ ,  $LL_{vgll3}EL_{akap11}$ ,  $LL_{vgll3}LL_{akap11}$ .

200

## 201 RESULTS

202 A total of 5895 males were raised until the end of the experiment. The overall maturation rate  
203 was 2.87%. Average mass, length and maturation rate of each family is listed in Supplementary  
204 Table 1. Of these 5895 individuals, 4769 had recombinant genotypes (i.e. carrying a haplotype with  
205 an *L* allele for *vgll3* and an *E* allele for *akap11*, or vice versa). The *E* allele frequencies of *vgll3* and  
206 *akap11* were 0.30 and 0.69, respectively.

207 The most parsimonious model explaining maturation status included length as a fixed effect  
208 and family as a random effect. *Vgll3* had a much stronger effect than *akap11* on maturation status,  
209 where the *vgll3* *EE* and *EL* genotypes increased the  $\log(\text{odds ratio})$  of maturing relative to the *LL*  
210 genotype by 4.21 and 1.79, respectively. Contrastingly, only the *akap11* *EE* genotype had a  
211 marginally significant negative effect on the odds of maturation, whereby it decreased the  $\log(\text{odds}$   
212  $\text{ratio})$  of maturing by 1.30 (Figure 1, Supplementary Table 3). Similarly, the effects of combined  
213 genotypes on the odds of maturation suggested a strong effect of all *vgll3* genotypes and a weak  
214 effect of the *akap11* *EE* genotype. Allele changes at *vgll3* alter the odds of maturation for all  
215 observed genotype combinations, whereby genotypes with *vgll3* *E* alleles increased the odds of  
216 maturation relative to those with the *L* allele (Figure 2a, b). In contrast allele changes at *akap11*  
217 altered the odds of maturation for only one genotype combination ( $EL_{vgll3}EE_{akap11}$ ), whereby the  
218  $EL_{vgll3}EE_{akap11}$  genotype slightly decreased the odds of maturation relative to  $EL_{vgll3}EL_{akap11}$   
219 genotype (Figure 2c, d, Supplementary Tables 4-7).

220

## 221 DISCUSSION

222 Previous genome-wide association studies (GWAS), found a strong association between  
223 maturation timing in Atlantic salmon and a region on chromosome 25. These studies have shown  
224 that significantly associated SNPs span a ~250kb genomic with the strongest association signal  
225 occurring between two genes, *vgll3* and *akap11*. Due to linkage disequilibrium within the region, it  
226 remained unclear which SNPs were potentially causal and which were spuriously associated via  
227 linkage. Here, we took advantage of existing recombination events to breed a large set of progeny



228 with reduced linkage disequilibrium between potential causal SNPs at the candidate locus. We  
229 found that SNP variation within *akap11* has little to no effect on maturation timing and therefore the  
230 effect of the locus is primarily driven by variation in closer proximity to *vgll3*. This refines the  
231 genomic location of SNP variation affecting Atlantic salmon maturation timing at a key large-effect  
232 locus and improves our understanding of the gene variation most likely underlying differences in  
233 maturation timing. These findings will help guide future experimentation determining the role of  
234 this large-effect locus in genetic processes involved in Atlantic salmon maturation.

235 Here, we measured the effect of *vgll3* based on the genotype of a SNP 7.5kb downstream of  
236 *vgll3* that showed the strongest association in 57 wild Atlantic salmon populations (Barson et al.  
237 2015). This genotype was in complete linkage disequilibrium with the genotypes of the two  
238 missense mutations within *vgll3* due to our parent selection criteria. Regardless of the  
239 accompanying *akap11* genotype, the *vgll3* genotype had a strong effect on maturation timing, with  
240 the *E* allele showing similar strong positive effects on early maturation. In contrast, *akap11*  
241 genotype showed a relatively small effect on maturation where maturation odds unexpectedly  
242 decreased in *EL* and *EE* individuals relative to *LL* individuals. If the effect of *akap11* variation is  
243 true, its relative contribution to controlling maturation timing would be minimal given the effect is  
244 both small and found in only one genotype class. These results provide convincing evidence that  
245 variation closer to *vgll3* than *akap11* is linked with maturation timing, at least in male parr.  
246 However, it is important to recognize that we do not yet know if any of the *vgll3*-SNPs are causal  
247 themselves, or simply linked to causal variation. Additionally, we cannot rule out the possibility  
248 that the causal variation driving the *vgll3* genotype effect alters the functioning of a different gene,  
249 however given the tight genetic linkage of the *vgll3*-SNPs and *vgll3*, *vgll3* variation is nevertheless  
250 strongly associated with maturation timing. Recent functional research also supports this notion -  
251 *vgll3* expression in immature testes of Atlantic salmon differs between *vgll3* genotypes, *EE* and *LL*  
252 (Verta et al. 2020), which suggests that SNP variation linked with *vgll3* also associates with altered  
253 *vgll3* function. Further, we cannot exclude the possibility that the causal variation may regulate both  
254 *vgll3* and *akap11* given their close proximity. Shared regulatory regions are prevalent in the human  
255 genome (Trinklein et al. 2004). Interestingly, expression of *vgll3* and *akap11* are correlated during  
256 early development (Kurko et al. 2020). Examining genotype-specific expression levels of *akap11*  
257 and *vgll3* in recombinant individuals may help to further resolve the functional significance of the  
258 causal variation at this large-effect locus.

259 No recombination events introducing haplotypes with the *vgll3 E* and *akap11 L* alleles were  
260 found in the parental source. Therefore, there were no progeny with genotypes *EE<sub>vgll3</sub>EL* and

261 *EE<sub>vgll3LL</sub>* and we were thus unable to test the effect of these genotype combinations. Furthermore, it  
262 is unclear whether the haplotypes with *vgll3 L* and *akap11 E* alleles found here arose via a single  
263 recombination event, or multiple events. Sequencing of this region in the parental individuals would  
264 identify the location of recombination breakpoint(s) and therefore the number of recombination  
265 events. The location of breakpoint(s) also helps to narrow down the causal region, as any variation  
266 downstream of the breakpoint can be ruled out.

267 A further caveat of our study is that due to large number of individuals raised, we did not have  
268 resources for genotyping a sufficient number of loci for parentage assignment and were thus unable  
269 to randomize individuals across tanks. For this reason, we are unable to tease apart tank effects and  
270 family effects and therefore the effect of the term “family” in our models also includes any tank  
271 effects. To help account for this we included multiple families for most of the cross types, which  
272 ensured each of the genotype combinations were raised in multiple tanks. We also expect that  
273 family effects would account for a substantial portion of the variation explained by the family/tank  
274 model term given the polygenic architecture of Atlantic salmon maturation (Sinclair-Waters et al.  
275 2020). Additionally, Debes et al. (2019) randomized individuals from many families across multiple  
276 tanks and found inter-family variation in maturation rate and no effect of tank.

277 Our findings suggest that *vgll3* would be an appropriate target for knockout with CRISPR to  
278 further resolve the effect of *vgll3* on Atlantic salmon maturation. Genome editing with CRISPR-  
279 *Cas9* has successfully generated Atlantic salmon with gene knock-outs (Wargelius et al. 2016;  
280 Edvardsen et al. 2014). Further, in other species, the variants causing trait variation have been finely  
281 mapped to a single or set of mutation(s) with CRISPR-*Cas9* genome editing (Karageorgi et al.  
282 2019; Li et al. 2020; Ward et al. 2021). Given the large-effect of the *vgll3* locus, it would be an  
283 interesting focus for fine-mapping with genome editing technology, whereby effects of the two  
284 missense mutations and the top-associated SNPs from previous association studies could be  
285 delineated. Single base editing of the known missense mutation and top-associated SNPs could  
286 introduce novel genotype combinations and help to more finely map and/or validate causal  
287 mutations at the *vgll3* locus. Some success with single base editing in Atlantic salmon has been  
288 accomplished, whereby 30% to 60% efficiency was achieved (Straume et al. 2021), suggesting  
289 editing of *vgll3* SNPs may be feasible. Alternatively, identifying individuals carrying natural  
290 recombinant alleles at the *vgll3* locus may be possible, however this may require genotyping and  
291 scanning a large number individuals from many source populations, followed by rearing of males  
292 and females to maturation age.

293 As genome assembly and genomic data production for species in the wild becomes easier, the  
294 number of candidate loci linked to association and/selection signals is likely to rise. Our findings  
295 demonstrate how, when identified, natural recombinants can be used to more precisely map causal  
296 variation underlying such signals when phenotypic data can be obtained. Furthermore, offspring,  
297 from controlled crosses maximizing the number of recombinants, could potentially be released into  
298 the wild, which would allow for follow-up studies in the wild. Such follow-up studies in the wild  
299 are unlikely possible if CRISPR or other genome editing technology is used. Another approach that  
300 takes advantage of natural recombination events, admixture mapping (Vasemägi and Primmer 2005;  
301 Mckeigue 1998), can be applied in a natural setting and is thus a promising method in systems  
302 where raising individuals in captivity is not feasible. Admixture mapping, however, relies on  
303 hybridization between populations with different allele frequencies at trait-associated loci and  
304 therefore can only be applied under these specific conditions. In conclusion, using natural  
305 recombination events to narrow down the genomic location of causal variation of ecologically  
306 relevant traits is an effective approach and can be especially useful in systems where genome editing  
307 is particularly challenging or not feasible.

308

### 309 **Acknowledgements**

310 Funding was provided by Academy of Finland (grant numbers 307593, 302873 and 327255), the  
311 European Research Council under the European Union's Horizon 2020 research and  
312 innovation program (grant no. 742312) and a Natural Sciences and Engineering Research Council  
313 of Canada postgraduate scholarship. We would like to acknowledge staff at the Natural Resources  
314 Institute Finland hatchery in Laukaa and members of the Evolution, Conservation and Genomics  
315 research group for their help in coordinating and collecting gametes for crosses. We acknowledge  
316 Shadi Jansouz for performing DNA extractions. We thank Paul Debes for sharing advice and  
317 experience from prior experiments on salmon maturation. We thank Nea Asumaa, Eirini  
318 Karathanou, Clelia Mulà, and Seija Tillanen for help with fish husbandry. We also thank Nea  
319 Asumaa, Iikki Donner, Dorian Jagusch, Eirini Karathanou, Jacqueline Moustakas-Verho, Clelia  
320 Mulà, Outi Ovaskainen, Seija Tillanen, and Valeria Valanne for help with tagging, tissue sampling,  
321 and phenotyping.

### 322 **Data Accessibility**

323 Genotypes and phenotypic data that support the findings of this study are openly available in Dryad  
324 at [http://doi.org/\[doi\]](http://doi.org/[doi]).

### 325 **Authors' Contributions**

326 CRP, MSW conceived the study. MSW, CRP designed crosses. CRP, NP, MSW designed  
327 experimental setup. NP supervised fish husbandry and maintenance of fish-raising facility. MSW,  
328 NP led tagging, tissue collection, and phenotypic data collection. AR, TA, CRP developed the  
329 KASP genotyping protocol. AR performed genotyping. MSW performed genotype calling and data  
330 analysis. JE provided parental material for crosses. MSW, CRP drafted the manuscript. All authors  
331 approved the final version of the manuscript.

### 332 **Competing interests**

333 There are no competing interests.

334

335 Table 1. Description of the six types of crosses used including parental genotypes, number of  
 336 families per cross type and proportions of offspring genotypes. The first and last two alleles listed  
 337 indicate the *vgl3* and *akap11* genotypes, respectively, where *E* and *L* are the alleles found to be  
 338 associated with earlier and later maturation, respectively, in Barson et al. (2015).

| Cross type                                                                         | # of families | Offspring genotypes                                                                                                                                                                                          |
|------------------------------------------------------------------------------------|---------------|--------------------------------------------------------------------------------------------------------------------------------------------------------------------------------------------------------------|
| <i>EL<sub>vgl3</sub>EE<sub>akap11</sub> × EL<sub>vgl3</sub>EL<sub>akap11</sub></i> | 3             | ~25% <i>EE<sub>vgl3</sub>EE<sub>akap11</sub></i> , ~25% <i>EL<sub>vgl3</sub>EE<sub>akap11</sub></i> ,<br>~25% <i>EL<sub>vgl3</sub>EL<sub>akap11</sub></i> , ~25% <i>LL<sub>vgl3</sub>EL<sub>akap11</sub></i> |
| <i>LL<sub>vgl3</sub>EL<sub>akap11</sub> × EL<sub>vgl3</sub>EL<sub>akap11</sub></i> | 6             | ~25% <i>EL<sub>vgl3</sub>EE<sub>akap11</sub></i> , ~25% <i>EL<sub>vgl3</sub>EL<sub>akap11</sub></i> ,<br>~25% <i>LL<sub>vgl3</sub>EL<sub>akap11</sub></i> , ~25% <i>LL<sub>vgl3</sub>LL<sub>akap11</sub></i> |
| <i>LL<sub>vgl3</sub>EL<sub>akap11</sub> × EL<sub>vgl3</sub>EE<sub>akap11</sub></i> | 3             | ~25% <i>EL<sub>vgl3</sub>EE<sub>akap11</sub></i> , ~25% <i>LL<sub>vgl3</sub>EE<sub>akap11</sub></i> ,<br>~25% <i>EL<sub>vgl3</sub>EL<sub>akap11</sub></i> , ~25% <i>LL<sub>vgl3</sub>EL<sub>akap11</sub></i> |
| <i>LL<sub>vgl3</sub>LL<sub>akap11</sub> × LL<sub>vgl3</sub>EL<sub>akap11</sub></i> | 2             | ~50% <i>LL<sub>vgl3</sub>EL<sub>akap11</sub></i> , ~50% <i>LL<sub>vgl3</sub>LL<sub>akap11</sub></i>                                                                                                          |
| <i>LL<sub>vgl3</sub>EE<sub>akap11</sub> × EL<sub>vgl3</sub>EE<sub>akap11</sub></i> | 1             | ~50% <i>EL<sub>vgl3</sub>EE<sub>akap11</sub></i> , ~50% <i>LL<sub>vgl3</sub>EE<sub>akap11</sub></i>                                                                                                          |
| <i>EL<sub>vgl3</sub>EE<sub>akap11</sub> × EE<sub>vgl3</sub>EE<sub>akap11</sub></i> | 1             | ~50% <i>EE<sub>vgl3</sub>EE<sub>akap11</sub></i> , ~50% <i>EL<sub>vgl3</sub>EE<sub>akap11</sub></i>                                                                                                          |

339

340

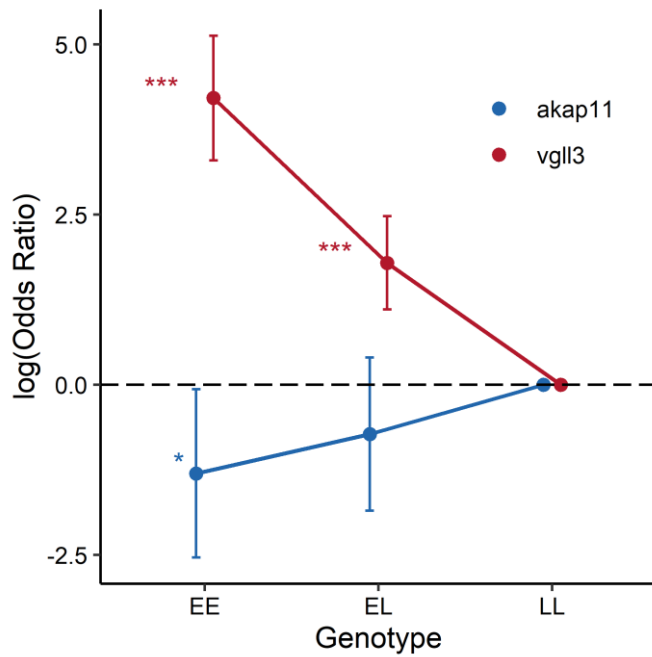

341

342 Figure 1. Ratio of the odds of maturation on the logarithmic scale and the respective 95%  
343 confidence intervals of the *EE* and *EL* genotypes for *vgl3* and *akap11*, relative to the *LL* genotype.  
344 Asterisks denote level of significance (\*  $p$ -value < 0.05, \*\*\*  $p$ -value < 0.001). The *E* and *L* refer to  
345 the alleles associated with earlier and later maturation, respectively, in Barson et al (2015).

346

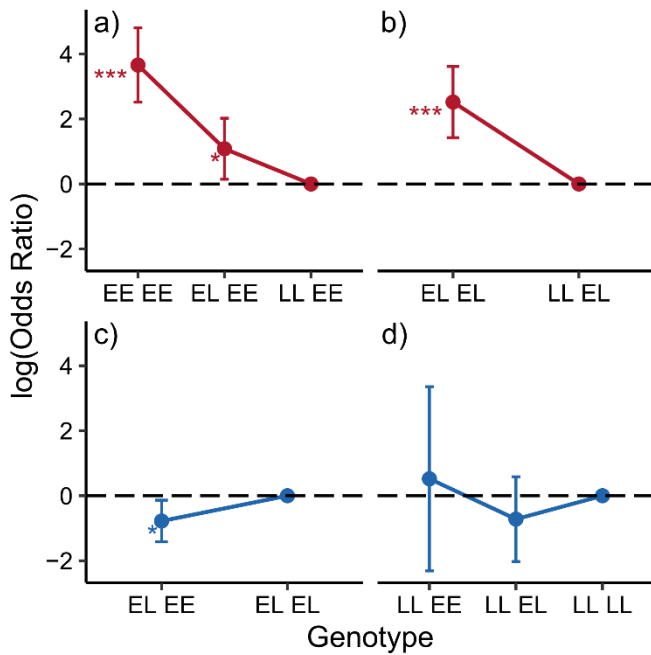

347

348 Figure 2. Ratio of the odds of maturation on the logarithmic scale and the respective 95%  
 349 confidence intervals of the combined genotypes. Each comparison is plotted separately: a)  
 350  $EE_{vgl3}EE_{akap11}$ ,  $EL_{vgl3}EE_{akap11}$ ,  $LL_{vgl3}EE_{akap11}$ ; b)  $EL_{vgl3}EL_{akap11}$ ,  $LL_{vgl3}EL_{akap11}$ ; c)  $EL_{vgl3}EE_{akap11}$ ,  
 351  $EL_{vgl3}EL_{akap11}$ ; and d)  $LL_{vgl3}EE_{akap11}$ ,  $LL_{vgl3}EL_{akap11}$ ,  $LL_{vgl3}LL_{akap11}$ . Estimates within each  
 352 comparison are relative to the genotype with the most *L* alleles. Asterisks denote level of  
 353 significance (\*  $p$ -value < 0.05, \*\*\*  $p$ -value < 0.001). The first and last two alleles listed indicate the  
 354 *vgl3* and *akap11* genotypes, respectively, where *E* and *L* are the alleles found to be associated with  
 355 earlier and later maturation, respectively, in Barson et al. (2015).

356

## 357 **References**

- 358 Albadri, Shahad, Flavia De Santis, Vincenzo Di Donato, and Filippo Del Bene. 2017.  
359 “CRISPR/Cas9-Mediated Knockin and Knockout in Zebrafish.” In , edited by Rudolf Jaenisch,  
360 Feng Zhang, and Fred Gage, 41–49. Cham (CH). [https://doi.org/10.1007/978-3-319-60192-](https://doi.org/10.1007/978-3-319-60192-2_4)  
361 [2\\_4](https://doi.org/10.1007/978-3-319-60192-2_4).
- 362 Aykanat, T., M. Lindqvist, V. L. Pritchard, and C. R. Primmer. 2016. “From Population Genomics  
363 to Conservation and Management: A Workflow for Targeted Analysis of Markers Identified  
364 Using Genome-Wide Approaches in Atlantic Salmon *Salmo Salar*.” *Journal of Fish Biology*,  
365 no. 89: 2658–79. <https://doi.org/10.1111/jfb.13149>.
- 366 Ayllon, Fernando, Erik Kjærner-Semb, Tomasz Furmanek, Vidar Wennevik, Monica F. Solberg,  
367 Geir Dahle, Geir Lasse Taranger, et al. 2015. “The *Vgll3* Locus Controls Age at Maturity in  
368 Wild and Domesticated Atlantic Salmon (*Salmo Salar* L.) Males.” *PLoS Genetics* 11 (11): 1–  
369 15. <https://doi.org/10.1371/journal.pgen.1005628>.
- 370 Barson, Nicola J, Tutku Aykanat, Kjetil Hindar, Matthew Baranski, Geir H Bolstad, Peder Fiske,  
371 Céleste Jacq, et al. 2015. “Sex-Dependent Dominance at a Single Locus Maintains Variation in  
372 Age at Maturity in Salmon.” *Nature* 528 (7582): 405–8.  
373 <https://doi.org/https://doi.org/10.1038/nature16062>.
- 374 Barton, K. 2020. “MuMIn: Multi-Model Inference. R Package Version 1.43.17.”
- 375 Concha, Carolina, Richard W.R. Wallbank, Joseph J. Hanly, Jennifer Fenner, Luca Livraghi,  
376 Edgardo Santiago Rivera, Daniel F. Paulo, et al. 2019. “Interplay between Developmental  
377 Flexibility and Determinism in the Evolution of Mimetic *Heliconius* Wing Patterns.” *Current*  
378 *Biology* 29 (23): 3996-4009.e4. <https://doi.org/10.1016/j.cub.2019.10.010>.
- 379 Cousminer, Diana L., Diane J. Berry, Nicholas J. Timpson, Wei Ang, Elisabeth Thiering, Enda M.  
380 Byrne, H. Rob Taal, et al. 2013. “Genome-Wide Association and Longitudinal Analyses  
381 Reveal Genetic Loci Linking Pubertal Height Growth, Pubertal Timing and Childhood  
382 Adiposity.” *Human Molecular Genetics* 22 (13): 2735–47.  
383 <https://doi.org/10.1093/hmg/ddt104>.
- 384 Day, Felix R., Deborah J. Thompson, Hannes Helgason, Daniel I. Chasman, Hilary Finucane,  
385 Patrick Sulem, Katherine S. Ruth, et al. 2017. “Genomic Analyses Identify Hundreds of  
386 Variants Associated with Age at Menarche and Support a Role for Puberty Timing in Cancer  
387 Risk.” *Nature Genetics* 49 (6): 834–41. <https://doi.org/10.1038/ng.3841>.
- 388 Debes, Paul V, Nikolai Piavchenko, Annukka Ruokolainen, Jacqueline E Moustakas-verho, Noora  
389 Parre, Tutku Aykanat, Jaakko Erkinaro, Craig R Primmer, and Paul V Debes. 2019. “Large  
390 Single-Locus Effects for Maturation Timing Are Mediated via Body Condition in Atlantic  
391 Salmon.” *BioRxiv*. <https://doi.org/10.1101/780437>.
- 392 Edvardsen, Rolf B., Sven Leininger, Lene Kleppe, Kai Ove Skaftnesmo, and Anna Wargelius.  
393 2014. “Targeted Mutagenesis in Atlantic Salmon (*Salmo Salar* L.) Using the CRISPR/Cas9  
394 System Induces Complete Knockout Individuals in the F0 Generation.” *PLoS ONE* 9 (9).  
395 <https://doi.org/10.1371/journal.pone.0108622>.
- 396 Erkinaro, Jaakko, Yann Czorlich, Panu Orell, Jorma Kuusela, Morten Falkegård, Maija Länsman,  
397 Henni Pulkkinen, Craig R Primmer, and Eero Niemelä. 2019. “Life History Variation across  
398 Four Decades in a Diverse Population Complex of Atlantic Salmon in a Large Subarctic  
399 River.” *Canadian Journal of Fisheries and Aquatic Sciences* 76 (1): 42–55.  
400 <https://doi.org/10.1139/cjfas-2017-0343>.



- 401 Fleming, I. A., and S Einum. 2011. “Reproductive Ecology: A Tale of Two Sexes.” In *Atlantic*  
402 *Salmon Ecology*, 35–65.
- 403 Good, Christopher, and John Davidson. 2016. “A Review of Factors Influencing Maturation of  
404 Atlantic Salmon, *Salmo Salar*, with Focus on Water Recirculation Aquaculture System  
405 Environments.” *Journal of the World Aquaculture Society* 47 (5): 605–32.  
406 <https://doi.org/10.1111/jwas.12342>.
- 407 Halperin, Daniel S., Calvin Pan, Aldons J. Lulis, and Peter Tontonoz. 2013. “Vestigial-like 3 Is an  
408 Inhibitor of Adipocyte Differentiation.” *Journal of Lipid Research* 54 (2): 473–81.  
409 <https://doi.org/10.1194/jlr.m032755>.
- 410 He, Chunlin, John Holme, and Jeffrey Anthony. 2014. “SNP Genotyping: The KASP Assay BT -  
411 Crop Breeding: Methods and Protocols.” In , edited by Delphine Fleury and Ryan Whitford,  
412 75–86. New York, NY: Springer New York. [https://doi.org/10.1007/978-1-4939-0446-4\\_7](https://doi.org/10.1007/978-1-4939-0446-4_7).
- 413 Johnston, Susan E., John C. McEwan, Natalie K. Pickering, James W. Kijas, Dario Beraldi, Jill G.  
414 Pilkington, Josephine M. Pemberton, and Jon Slate. 2011. “Genome-Wide Association  
415 Mapping Identifies the Genetic Basis of Discrete and Quantitative Variation in Sexual  
416 Weaponry in a Wild Sheep Population.” *Molecular Ecology* 20 (12): 2555–66.  
417 <https://doi.org/10.1111/j.1365-294X.2011.05076.x>.
- 418 Johnston, Susan E., Panu Orell, Victoria L. Pritchard, Matthew P. Kent, Sigbjørn Lien, Eero  
419 Niemelä, Jaakko Erkinaro, and Craig R. Primmer. 2014. “Genome-Wide SNP Analysis  
420 Reveals a Genetic Basis for Sea-Age Variation in a Wild Population of Atlantic Salmon  
421 (*Salmo Salar*).” *Molecular Ecology* 23 (14): 3452–68. <https://doi.org/10.1111/mec.12832>.
- 422 Karageorgi, Marianthi, Simon C Groen, Fidan Sumbul, Julianne N Pelaez, Kirsten I Verster, Jessica  
423 M Aguilar, Amy P Hastings, et al. 2019. “Genome Editing Retraces the Evolution of Toxin  
424 Resistance in the Monarch Butterfly.” *Nature*. <https://doi.org/10.1038/s41586-019-1610-8>.
- 425 Kardos, Marty, Gordon Luikart, Rowan Bunch, Sarah Dewey, William Edwards, Sean McWilliam,  
426 John Stephenson, Fred W. Allendorf, John T. Hogg, and James Kijas. 2015. “Whole-Genome  
427 Resequencing Uncovers Molecular Signatures of Natural and Sexual Selection in Wild  
428 Bighorn Sheep.” *Molecular Ecology* 24 (22): 5616–32. <https://doi.org/10.1111/mec.13415>.
- 429 Kurko, Johanna, Paul V. Debes, Andrew H. House, Tutku Aykanat, Jaakko Erkinaro, and Craig R.  
430 Primmer. 2020. “Transcription Profiles of Age-at-Maturity-Associated Genes Suggest Cell  
431 Fate Commitment Regulation as a Key Factor in the Atlantic Salmon Maturation Process.” *G3*  
432 (*Bethesda, Md.*) 10 (1): 235–46. <https://doi.org/10.1534/g3.119.400882>.
- 433 Li, Feng, Akira Komatsu, Miki Ohtake, Heesoo Eun, Akemi Shimizu, and Hiroshi Kato. 2020.  
434 “Direct Identification of a Mutation in OsSh1 Causing Non-Shattering in a Rice (*Oryza Sativa*  
435 L.) Mutant Cultivar Using Whole-Genome Resequencing.” *Scientific Reports* 10 (1): 1–13.  
436 <https://doi.org/10.1038/s41598-020-71972-1>.
- 437 Livraghi, Luca, Arnaud Martin, Melanie Gibbs, Nora Braak, Saad Arif, and Casper J. Breuker.  
438 2018. *CRISPR/Cas9 as the Key to Unlocking the Secrets of Butterfly Wing Pattern*  
439 *Development and Its Evolution. Advances in Insect Physiology*. 1st ed. Vol. 54. Elsevier Ltd.  
440 <https://doi.org/10.1016/bs.aiip.2017.11.001>.
- 441 Luconi, Michaela, Vinicio Carloni, Fabio Marra, Pietro Ferruzzi, Gianni Forti, and Elisabetta Baldi.  
442 2004. “Increased Phosphorylation of AKAP by Inhibition of Phosphatidylinositol 3-Kinase  
443 Enhances Human Sperm Motility through Tail Recruitment of Protein Kinase A.” *Journal of*  
444 *Cell Science* 117 (Pt 7): 1235–46. <https://doi.org/10.1242/jcs.00931>.

- 445 Mckeigue, Paul M. 1998. "Mapping Genes That Underlie Ethnic Differences in Disease Risk :  
446 Methods for Detecting Linkage in Admixed Populations , by Conditioning on Parental  
447 Admixture," 241–51.
- 448 Miki, Kiyoshi, William D Willis, Paula R Brown, Eugenia H Goulding, Kerry D Fulcher, and  
449 Edward M Eddy. 2002. "Targeted Disruption of the Akap4 Gene Causes Defects in Sperm  
450 Flagellum and Motility." *Developmental Biology* 248 (2): 331–42.  
451 <https://doi.org/10.1006/dbio.2002.0728>.
- 452 Mobley, K.B., Hanna Granroth-Wilding, Mikko Ellmén, Panu Orell, Jaakko Erkinaro, and Craig R.  
453 Primmer. 2020. "Time Spent in Distinct Life History Stages Has Sex-Specific Effects on  
454 Reproductive Fitness in Wild Atlantic Salmon." *Molecular Ecology* 29 (6): 1173–84.  
455 <https://doi.org/10.1111/mec.15390>.
- 456 Mobley, Kenyon B., Tutku Aykanat, Yann Czorlich, Andrew House, Johanna Kurko, Antti  
457 Miettinen, Jacqueline Moustakas-Verho, et al. 2021. *Maturation in Atlantic Salmon (Salmo*  
458 *Salar, Salmonidae): A Synthesis of Ecological, Genetic, and Molecular Processes. Reviews in*  
459 *Fish Biology and Fisheries*. Vol. 0123456789. <https://doi.org/10.1007/s11160-021-09656-w>.
- 460 Perry, John R B, Felix Day, Cathy E Elks, Patrick Sulem, Deborah J Thompson, Teresa Ferreira,  
461 Chunyan He, et al. 2014. "Parent-of-Origin-Specific Allelic Associations among 106 Genomic  
462 Loci for Age at Menarche." *Nature* 514 (July): 92. <https://doi.org/http://10.0.4.14/nature13545>.
- 463 Pritchard, V. L., Makinen H., Vähä J.-P., Erkinaro J., Orell P., and C.R. Primmer. 2018. "Genomic  
464 Signatures of Fine-Scale Selection in Atlantic Salmon Suggest Involvement of Sexual  
465 Maturation, Energy Homeostatis, and Immune Defence-Related Genes." *Molecular Ecology*  
466 27: 2560–75. <https://doi.org/10.1111/mec.14705>.
- 467 Reinton, Nils, Philippe Collas, Trine B Haugen, Bjørn S Skålhegg, Vidar Hansson, Tore Jahnsen,  
468 and Kjetil Taskén. 2000. "Localization of a Novel Human A-Kinase-Anchoring Protein,  
469 HAKAP220, during Spermatogenesis." *Developmental Biology* 223 (1): 194–204.  
470 <https://doi.org/https://doi.org/10.1006/dbio.2000.9725>.
- 471 Rodríguez-Leal, Daniel, Zachary H Lemmon, Jarrett Man, Madelaine E Bartlett, and Zachary B  
472 Lippman. 2017. "Engineering Quantitative Trait Variation for Crop Improvement by Genome  
473 Editing." *Cell* 171 (2): 470-480.e8. <https://doi.org/10.1016/j.cell.2017.08.030>.
- 474 Sander, Jeffry D, and J Keith Joung. 2014. "CRISPR-Cas Systems for Editing, Regulating and  
475 Targeting Genomes." *Nature Biotechnology* 32 (4): 347–55. <https://doi.org/10.1038/nbt.2842>.
- 476 Sedeek, Khalid E M, Ahmed Mahas, and Magdy Mahfouz. 2019. "Plant Genome Engineering for  
477 Targeted Improvement of Crop Traits." *Frontiers in Plant Science* 10 (February): 114.  
478 <https://doi.org/10.3389/fpls.2019.00114>.
- 479 Sinclair-Waters, Marion, Ian R. Bradbury, Corey J. Morris, Sigbjørn Lien, Matthew P. Kent, and  
480 Paul Bentzen. 2017. "Ancient Chromosomal Rearrangement Associated with Local Adaptation  
481 of a Post-Glacially Colonized Population of Atlantic Cod in the Northwest Atlantic."  
482 *Molecular Ecology*, no. October: 1–13. <https://doi.org/10.1111/mec.14442>.
- 483 Sinclair-Waters, Marion, Torfinn Nome, Jing Wang, Sigbjørn Lien, Matthew P Kent, Harald  
484 Sægrov, Bjørn Florø-Larsen, Geir H Bolstad, Craig R Primmer, and Nicola J Barson. 2021.  
485 "Dissecting the Loci Underlying Maturation Timing in Atlantic Salmon Using Haplotype and  
486 Multi-SNP Based Association Methods." *BioRxiv*. <https://doi.org/10.1101/2021.05.28.446127>.
- 487 Sinclair-Waters, Marion, Jørgen Ødegård, Sven Arild Korsvoll, Thomas Moen, Sigbjørn Lien,

- 488 Craig R. Primmer, and Nicola J. Barson. 2020. “Beyond Large-Effect Loci: Large-Scale  
489 GWAS Reveals a Mixed Large-Effect and Polygenic Architecture for Age at Maturity of  
490 Atlantic Salmon.” *Genetics, Selection, Evolution : GSE* 52 (1): 9.  
491 <https://doi.org/10.1186/s12711-020-0529-8>.
- 492 Straume, Anne Hege, Erik Kjærner-Semb, Kai Ove Skaftnesmo, Hilal Güralp, Simon Lillico, Anna  
493 Wargelius, and Rolf Brudvik Edvardsen. 2021. “A Refinement to Gene Editing in Atlantic  
494 Salmon Using Asymmetrical Oligonucleotide Donors.” bioRxiv.  
495 <https://doi.org/10.1101/2021.02.08.430296>.
- 496 The International Mouse Knockout Consortium. 2007. “A Mouse for All Reasons.” *Cell* 128 (1): 9–  
497 13. <https://doi.org/10.1016/j.cell.2006.12.018>.
- 498 Trinklein, Nathan D., Shelley Force Aldred, Sara J. Hartman, Diane I. Schroeder, Robert P. Otilar,  
499 and Richard M. Myers. 2004. “An Abundance of Bidirectional Promoters in the Human  
500 Genome.” *Genome Research* 14 (1): 62–66. <https://doi.org/10.1101/gr.1982804>.
- 501 Varshney, Gaurav K, Jing Lu, Derek E Gildea, Haigen Huang, Wuhong Pei, Zhongan Yang, Sunny  
502 C Huang, et al. 2013. “A Large-Scale Zebrafish Gene Knockout Resource for the Genome-  
503 Wide Study of Gene Function.” *Genome Research* 23 (4): 727–35.  
504 <https://doi.org/10.1101/gr.151464.112>.
- 505 Vasemägi, A., and C. R. Primmer. 2005. “Challenges for Identifying Functionally Important  
506 Genetic Variation: The Promise of Combining Complementary Research Strategies.”  
507 *Molecular Ecology* 14 (12): 3623–42. <https://doi.org/10.1111/j.1365-294X.2005.02690.x>.
- 508 Verta, Jukka-Pekka, Paul Vincent Debes, Nikolai Piavchenko, Annukka Ruokolainen, Outi  
509 Ovaskainen, Jacqueline Emmanuel Moustakas-Verho, Seija Tillanen, et al. 2020. “Cis-  
510 Regulatory Differences in Isoform Expression Associate with Life History Strategy Variation  
511 in Atlantic Salmon.” *PLOS Genetics* 16 (9): e1009055.  
512 <https://doi.org/10.1371/journal.pgen.1009055>.
- 513 Ward, Christopher M., Roswitha A. Aumann, Mark A. Whitehead, Katerina Nikolouli, Gary  
514 Leveque, Georgia Gouvi, Elisabeth Fung, et al. 2021. “White Pupae Phenotype of Tephritids Is  
515 Caused by Parallel Mutations of a MFS Transporter.” *Nature Communications* 12 (1): 1–12.  
516 <https://doi.org/10.1038/s41467-020-20680-5>.
- 517 Wargelius, Anna, Sven Leininger, Kai Ove Skaftnesmo, Lene Kleppe, Eva Andersson, Geir Lasse  
518 Taranger, Rudiger W. Schulz, and Rolf B. Edvardsen. 2016. “Dnd Knockout Ablates Germ  
519 Cells and Demonstrates Germ Cell Independent Sex Differentiation in Atlantic Salmon.”  
520 *Scientific Reports* 6 (5817): 1–8. <https://doi.org/10.1038/srep21284>.
- 521 Woronik, Alyssa, Kalle Tunström, Michael W. Perry, Ramprasad Neethiraj, Constanti Stefanescu,  
522 Maria de la Paz Celorio-Mancera, Oskar Brattström, et al. 2019. “A Transposable Element  
523 Insertion Is Associated with an Alternative Life History Strategy.” *Nature Communications* 10  
524 (1). <https://doi.org/10.1038/s41467-019-13596-2>.
- 525 Wucherpennig, Julia I., Craig T. Miller, and David M. Kingsley. 2019. “Efficient CRISPR-Cas9  
526 Editing of Major Evolutionary Loci in Sticklebacks.” *Evolutionary Ecology Research* 20 (1–  
527 3): 1–29.
- 528 Yano, Ayaka, Barbara Nicol, Elodie Jouanno, Edwige Quillet, and Alexis Fostier. 2012. “The  
529 Sexually Dimorphic on the Y-Chromosome Gene ( SdY ) Is a Conserved Male-Specific Y-  
530 Chromosome Sequence in Many Salmonids.” *Evolutionary Applications*.  
531 <https://doi.org/10.1111/eva.12032>.
